# Supplementary material for: Retinoic Acid and POU Genes in Developing Amphioxus: A Focus on Neural Development
Source: MDPI journal article supplement (doi:10.3390/cells12040614), 2023-02-14
Supplement: s1 [file s1]

**Table S1. Sequence of the primers used in this study.**

|                         |                                |
|-------------------------|--------------------------------|
| <i>Pit-1</i> forward    | 5'-GTCCGCACCTGCCTTTCCCCTACC-3' |
| <i>Pit-1</i> reverse    | 5'-GCCACGCGCACGATGTCCTGAGA-3'  |
| <i>Pou2</i> forward     | 5'-CAACGGGTCAGTGAATGGGATAGA-3' |
| <i>Pou2</i> reverse     | 5'-CCGCTTGGTGGAGGGATGAC-3'     |
| <i>Pou3l</i> forward    | 5'-TCACCGCCGCACCTGGAGAA-3'     |
| <i>Pou3l</i> reverse    | 5'-TGCCGTGCCCCGTTGGTCATC-3'    |
| <i>Brn1/2/4</i> forward | 5'-GGTCTTCGCCCCTGCTTAGTAGTC-3' |
| <i>Brn1/2/4</i> reverse | 5'-TCGTTGTTTTGGCCCCTGGTAGTC-3' |
| <i>Pou4</i> forward     | 5'-ATGCACCCTCCAATAACTGCCG-3'   |
| <i>Pou4</i> reverse     | 5'-TTATCTCCCGCCTTGCTGCG-3'     |
| <i>Pou6</i> forward     | 5'-TCTGAACGCCGTCCACTCTATGAA-3' |
| <i>Pou6</i> reverse     | 5'-GTCTGGCGGGCGAAGCGTTTGTG-3'  |

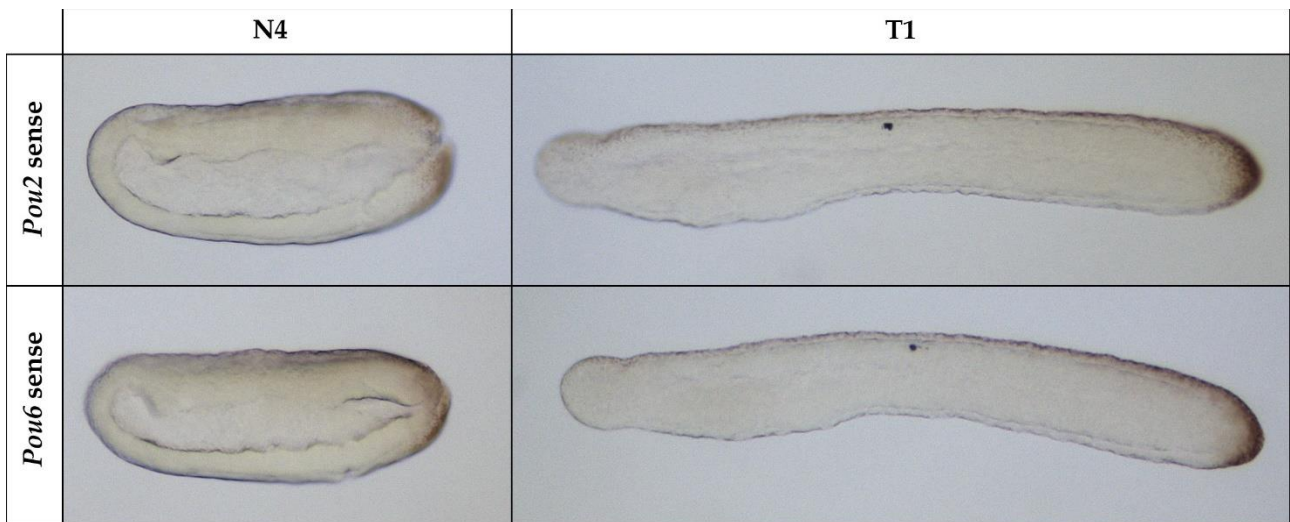

**Figure S1.** Negative control *in situ* hybridization with sense probes for *Pou2* and *Pou6*. No signal is detected in control embryos after the same experimental protocol that yielded a specific signal with the antisense probes shown in Figures 2 and 4.
